# Supplementary material for: Molecular and Physiological Logics of the Pyruvate-Induced Response of a Novel Transporter in Bacillus subtilis
Source: PubMed Central journal article supplement (PMC5626966; doi:10.1128/mbio.00976-17), 2017-10-03
Supplement: mbo005173508st1.pdf [file mbo005173508st1.pdf]

1 **Table S1. Growth rates of wild-type, mutants and complemented strains in M9 plus various substrates**

| Strains           | Growth rate ( $\mu$ , h <sup>-1</sup> ) |             |             |             |
|-------------------|-----------------------------------------|-------------|-------------|-------------|
|                   | M9P                                     | M9G         | M9M         | M9SE        |
| BSB168            | 0.25 ± 0.08                             | 0.74 ± 0.04 | 0.83 ± 0.05 | 0.52 ± 0.08 |
| TC58              | - <sup>b</sup>                          | 0.67 ± 0.03 | 0.80 ± 0.04 | 0.52 ± 0.08 |
| TC60              | - <sup>b</sup>                          | 0.70 ± 0.03 | 0.80 ± 0.05 | 0.49 ± 0.04 |
| TC61              | - <sup>b</sup>                          | 0.71 ± 0.01 | 0.78 ± 0.04 | 0.52 ± 0.05 |
| TC62              | - <sup>b</sup>                          | 0.72 ± 0.03 | 0.79 ± 0.04 | 0.53 ± 0.05 |
| TC73 <sup>a</sup> | 0.28 ± 0.07                             | 0.67 ± 0.02 | 0.78 ± 0.03 | 0.56 ± 0.03 |
| TC74 <sup>a</sup> | 0.25 ± 0.05                             | 0.66 ± 0.02 | 0.81 ± 0.02 | 0.47 ± 0.06 |
| TC75 <sup>a</sup> | 0.26 ± 0.04                             | 0.62 ± 0.07 | 0.76 ± 0.05 | 0.45 ± 0.06 |
| TC76 <sup>a</sup> | 0.25 ± 0.05                             | 0.65 ± 0.06 | 0.76 ± 0.04 | 0.47 ± 0.08 |

2 <sup>a</sup> the growth medium was supplemented with IPTG 200  $\mu$ M for functional complementation.

3 <sup>b</sup> cryptic growth (*i.e.* non exponential growth and low biomass final titer, see **Figure 1A**).

4

5
