# Supplementary material for: Molecular and Physiological Logics of the Pyruvate-Induced Response of a Novel Transporter in Bacillus subtilis
Source: PubMed Central journal article supplement (PMC5626966; doi:10.1128/mbio.00976-17), 2017-10-03
Supplement: mbo005173508st2.pdf [file mbo005173508st2.pdf]

1 **Table S2. Pyruvate concentrations, specific pyruvate uptake rate and PftAB expression level in various growth conditions**

| Growth conditions " <i>i</i> "                                        | (1)                       | (2)                       | (3)                      | (4)                       | (5)                       | (6)                       |
|-----------------------------------------------------------------------|---------------------------|---------------------------|--------------------------|---------------------------|---------------------------|---------------------------|
| Medium                                                                | MM+G                      | M9P                       | M9G+P                    | M9G                       | M9PM                      | M9M                       |
| $J_{net}^{(i)} = q_{pyr}$ (mmol.h <sup>-1</sup> .gCDW <sup>-1</sup> ) | -                         | 8.26 ± 0.23 <sup>f</sup>  | 1.90 ± 0.06 <sup>c</sup> | -5.00 ± 0.15 <sup>c</sup> | 0.90 ± 0.10 <sup>g</sup>  | -                         |
| $[Pyr]_{ex}^{(i)}$ (mmol.L <sup>-1</sup> )                            | -                         | 68.14 ± 0.07 <sup>f</sup> | 1.70 ± 0.01 <sup>c</sup> | 0 <sup>a</sup>            | 45.42 ± 0.07 <sup>g</sup> | -                         |
| $[Pyr]_{in}^{(i)}$ (mmol.L <sup>-1</sup> )                            | 1.00 ± 0.20 <sup>e</sup>  | <i>n.d.</i> <sup>b</sup>  | <i>n.d.</i> <sup>b</sup> | <i>n.d.</i> <sup>b</sup>  | <i>n.d.</i> <sup>b</sup>  | 10.00 ± 2.00 <sup>h</sup> |
| <i>pftAB</i> under the control of                                     | P <sub><i>pftAB</i></sub> | P <sub><i>pftAB</i></sub> | P <sub><i>hs</i></sub>   | P <sub><i>hs</i></sub>    | P <sub><i>pftAB</i></sub> | P <sub><i>pftAB</i></sub> |
| PftAB expression level (U.OD <sup>-1</sup> )                          | 0.00 ± 0.10 <sup>d</sup>  | 4.50 ± 0.45 <sup>d</sup>  | 4.50 ± 0.50 <sup>d</sup> | 4.50 ± 0.50 <sup>d</sup>  | 0.50 ± 0.10 <sup>d</sup>  | 0.70 ± 0.15 <sup>d</sup>  |

2 <sup>a</sup> At the beginning of the growth (initial condition)

3 <sup>b</sup> *n.d.* not determined

4 <sup>c</sup> this work, inferred from the data plotted on **Figure S3**

5 <sup>d</sup> this work (**Table 3** and in **Supplemental Results**)

6 <sup>e</sup> from reference (26)

7 <sup>f</sup> from reference (7)

8 <sup>g</sup> from reference (12)

9 <sup>h</sup> from reference (22)

10

11
