# Supplementary material for: Molecular and Physiological Logics of the Pyruvate-Induced Response of a Novel Transporter in Bacillus subtilis
Source: PubMed Central journal article supplement (PMC5626966; doi:10.1128/mbio.00976-17), 2017-10-03
Supplement: mbo005173508st3.pdf [file mbo005173508st3.pdf]

**Table S3. Relationships between *B. subtilis* and *C. glutamicum* strains, plasmids and primers used in this work**

| Strain               | Plasmid                           | Primer                    | Sequence (5'→3') <sup>a</sup>                | Template                  |
|----------------------|-----------------------------------|---------------------------|----------------------------------------------|---------------------------|
| TC35                 | pBSB_P <sub>pftAB</sub>           | P <sub>pftAB</sub> _FW    | <u>CCGCGGGCTTTCCCAGCCTCTTGATTATTTAACC</u> AA | BSB168                    |
|                      |                                   | P <sub>pftAB</sub> _RV    | GTTCCTCCTTCCCACCCTCATTATAAATAAGAA            | BSB168                    |
| TC58                 | pGEMT_lytST                       | LytT_FW                   | GATAAAGGAAGCGCAATTGC                         | BSB168                    |
|                      |                                   | LytT_RV                   | CAATGGAACAGGCAGTTTTTA                        | BSB168                    |
|                      | pGEMT_lytST::cm                   | Cm_lytT_FW                | TCCCCCGGGGATTCACCGACAAACAACAGATAAAA          | pDG1661                   |
|                      |                                   | Cm_lytT_RV                | CCATCGATGGTATAAAAACCTTCTTCAACTAACGGG         | pDG1661                   |
| TC63                 | pDG1661_P <sub>pftB</sub>         | P <sub>pftB</sub> _FW     | CGGGATCCCGTTTGGTACCCTCATTATAAATAAGAA         | BSB168                    |
|                      |                                   | P <sub>pftB</sub> _RV     | CCCAAGCTTGGGGCTTTGTTCGTGAATACTGAATATA        | BSB168                    |
| TC60, TC61<br>& TC62 | pGEMT_pftAB                       | insert_pftAB_FW           | CCCCACCCAGAATACAAAGA                         | BSB168                    |
|                      |                                   | insert_pftAB_RV           | GGATGAACTGGCTTACTTGC                         | BSB168                    |
|                      | pGEMT_pftA                        | pGEMT_pftA_FW             | TCCCCCGGGGAAATCATATTTGAAACCAGCATAAT          | pGEMT_pftAB               |
|                      |                                   | pGEMT_pftA_RV             | GCTCTAGAGCACAAAAACAGTGCAAAGCCCGCAGAA         | pGEMT_pftAB               |
|                      | pGEMT_pftB                        | pGEMT_pftB_FW             | TCCCCCGGGGGAACCATGGCAACAACAAGGAGTGA          | pGEMT_pftAB               |
|                      |                                   | pGEMT_pftB_RV             | GCTCTAGAGCTAAAGGATTGGCTCTTGGAACATCCG         | pGEMT_pftAB               |
|                      | pGEMT_pftAB::cm                   | cm_FW                     | TCCCCCGGGGATCTTTATTCTTCAACTAAAGCACCCATTAG    | pDG1661                   |
|                      |                                   | cm_RV                     | GCTCTAGAGCGTAGAGGATCTGGAGCTGTA               | pDG1661                   |
|                      | pGEMT_pftA::cm_P <sub>pftAB</sub> | cm_P <sub>pftAB</sub> _FW | GCTCTAGAGCGGATCCCGTTTGGTACCCTCATTATA         | pDG1661_P <sub>pftA</sub> |
|                      |                                   | cm_P <sub>pftAB</sub> _RV | TCCCCCGGGGGAATAAAAACCTTCTTCAACTAACGG         | pDG1661_P <sub>pftA</sub> |
| TC73                 | pMUTIN4_lytST                     | lytST_FW                  | CGGGATCCATATTTTTTCTCCGCCTGTAAGCAAGTT         | BSB168                    |
|                      |                                   | lytST_RV                  | CGAGCTCGTTATAAAGCGCTTACAAGATAACATGCC         | BSB168                    |

|                         |                                                                                                                         |                                 |                                                                  |                                |
|-------------------------|-------------------------------------------------------------------------------------------------------------------------|---------------------------------|------------------------------------------------------------------|--------------------------------|
| TC74, TC75<br>& TC76    | pDR111_ <i>pftAB</i>                                                                                                    | <i>pftAB_FW</i>                 | <u>TCACGCGTCGACAGGAGGACTACTATGAGTGCTAAAAAAGTGTAC</u>             | BSB168                         |
|                         |                                                                                                                         | <i>pftB_RV</i>                  | <u>TCCTAGCTAGCTTATCCTCCGATCAGCTGCACGAACAC</u>                    | BSB168                         |
| TC153, TC154            | pDR111_ <i>pftAB</i>                                                                                                    | 618 FW                          | AAGGAAAAAAGCGGCCGCCAAACTTAAGAGTGTGTT                             | pic618                         |
|                         |                                                                                                                         | 618 RV                          | CTGGTGAAAAGAAAAACCACCTGGCGCCCAATACG                              | pic618                         |
|                         | pDG1664_P <sub>hs</sub> <i>pftAB</i>                                                                                    | P <sub>hs</sub> <i>pftAB</i> FW | AAATACGGGCAGACATGGCCTGCCCGGTTATTATTA                             | pDR111_ <i>pftAB</i>           |
|                         |                                                                                                                         | P <sub>hs</sub> <i>pftAB</i> RV | AAGGAAAAAAGCGGCCCGGATTAATTAATTCAGAACGCTCGGTTG                    | pDR111_ <i>pftAB</i>           |
| TC125, TC126<br>& TC149 | pBSB_P <sub><i>pftAB-lyt1</i></sub> ,<br>pBSB_P <sub><i>pftAB-lyt2</i></sub><br>& pBSB_P <sub><i>pftAB-lyt1.2</i></sub> | <i>lyt1_FW</i>                  | <u>CGGGATCCAT</u> TCTGCAACTCAGACCCGCTATACG                       | pBSB_P <sub><i>pftAB</i></sub> |
|                         |                                                                                                                         | <i>lyt1,2_FW</i>                | <u>CGGGATCCAGACCCGCTATACGGCATGTTATCT</u>                         | pBSB_P <sub><i>pftAB</i></sub> |
|                         |                                                                                                                         | <i>lyt2_RV</i>                  | <u>GCGGATCCCCGAAATGGCTGAAATGCAA</u>                              | pBSB_P <sub><i>pftAB</i></sub> |
|                         |                                                                                                                         | <i>lyt1,2_RV</i>                | <u>GCGGATCCCCGAAAAGCCGCCCATCAAATATGG</u>                         | pBSB_P <sub><i>pftAB</i></sub> |
| TC122, TC124            | pPftA_SPA                                                                                                               | <i>pftA-LIC1</i>                | <u>GGGTTCCCTGGCGCGAGCCGGGTTTTTAACACAAGC</u>                      | BSB168                         |
|                         |                                                                                                                         | <i>pftA-LIC2</i>                | <u>TTGGGCTGGCGCGAGCATGGTGAACGAGTTCGTTATTG</u>                    | BSB168                         |
|                         | pPftB_SPA                                                                                                               | <i>pftB-LIC1</i>                | <u>GGGTTCCCTGGCGCGAGCGGCTCTATCTGCTCTGTACG</u>                    | BSB168                         |
|                         |                                                                                                                         | <i>pftB-LIC2</i>                | <u>TTGGGCTGGCGCGAGCTCCTCCGATCAGCTGCACG</u>                       | BSB168                         |
| TC199                   | pSG-SPA-NTER                                                                                                            | OOD141                          | <u>GGGCTCGAGATGAGTGCTAAAAAAGTGTACGGG</u>                         | BSB168                         |
|                         |                                                                                                                         | OOD142                          | <u>GGGGCGGCCGCTTAATGGTGATGGTGATGGTGTCTCCTCCGATCAGC</u><br>TGCACG | BSB168                         |
| TC202, TC203            | pXMJ_ <i>pftAB</i>                                                                                                      | <i>pftAB_Cg_fw</i>              | <u>TCACGCGTCGACAGGAGGACTACTATGAGTGCTAAAAAAGTGTAC</u>             | BSB168                         |
|                         |                                                                                                                         | <i>pftAB_Cg_rev</i>             | <u>TCCCCCGGGGTTATCCTCCGATCAGCTGCACGAACAC</u>                     | BSB168                         |

<sup>a</sup> Restriction sites and additional LIC and His<sub>6</sub> sequences are underlined
